# Supplementary material for: Enhancing the selectivity of the hydrogenation of naphthalene to tetralin by high temperature water
Source: Royal Society of Chemistry journal article supplement (doi:10.1039/b904305e), 2009-01-01
Supplement: b904305e.pdf [file b904305e.pdf]

## Electronic Supplementary Information

### Enhancing selectivity of hydrogenation of naphthalene to tetralin by high temperature water

Yan Cheng,<sup>a</sup> Honglei Fan,<sup>a</sup> Suxiang Wu,<sup>a</sup> Qian Wang,<sup>a</sup> Jin Guo,<sup>a,b</sup> Liang  
Gao,<sup>c</sup> Baoning Zong<sup>c</sup> and Buxing Han<sup>\*a</sup>

<sup>a</sup>Beijing National Laboratory for Molecular Sciences, Institute of Chemistry, Chinese Academy of Sciences, Beijing 100190, China

<sup>b</sup>China University of Mining & Technology, Beijing 100190, China

<sup>c</sup>Research Institute of Petroleum Processing, Sinopec, Beijing 100083, China

\*Corresponding author, Fax: 86-10-62559373; Tel: 86-10-62562821; E-mail:  
Hanbx@iccas.ac.cn

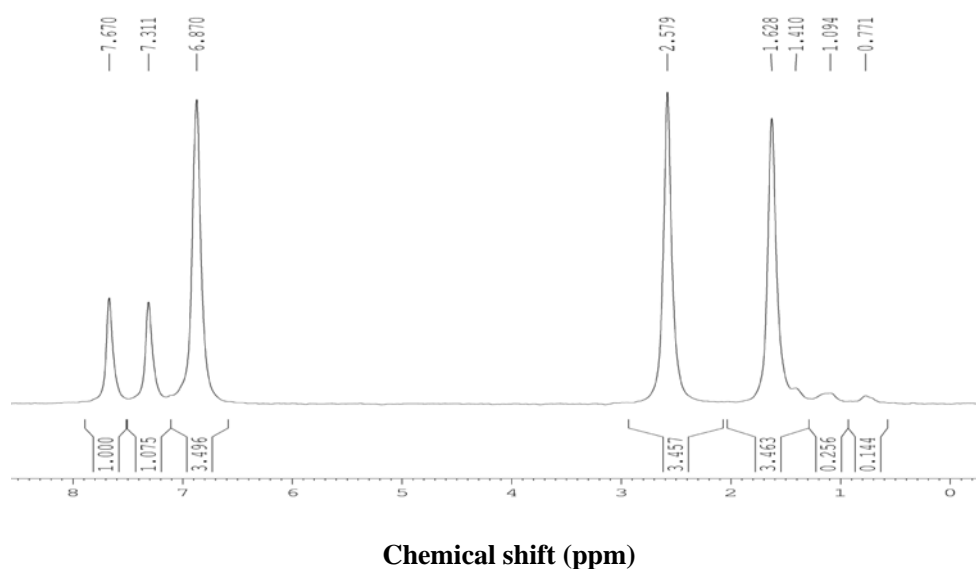

**Figure S1.** <sup>2</sup>H NMR spectrum of reaction product of naphthalene hydrogenation (Reaction conditions: 0.082 g/mL D<sub>2</sub>O, 100.0 mg naphthalene, 0.50 mL formic acid, 10.0 mg catalyst, 606 K, 5 hours)
